# Supplementary material
Source: PubMed Central journal article supplement (PMC6156886)
Supplement: ba021311-suppl1.pdf [file ba021311-suppl1.pdf]

## **China Lymphoma Collaborative Group (CLCG) investigators**

|                   |                                                                                                                                                                                               |
|-------------------|-----------------------------------------------------------------------------------------------------------------------------------------------------------------------------------------------|
| Tao Wu, MD        | Affiliated Hospital of Guizhou Medical University, Guizhou Cancer Hospital, Guiyang, Guizhou, P. R. China                                                                                     |
| Ye-Xiong Li, MD   | National Cancer Center/National Clinical Research Center for Cancer/Cancer Hospital, Chinese Academy of Medical Sciences (CAMS) and Peking Union Medical College (PUMC); Beijing, P. R. China |
| Yong Yang, MD     | National Cancer Center/National Clinical Research Center for Cancer/Cancer Hospital, Chinese Academy of Medical Sciences (CAMS) and Peking Union Medical College (PUMC); Beijing, P. R. China |
| Shu-Nan Qi, MD    | National Cancer Center/National Clinical Research Center for Cancer/Cancer Hospital, Chinese Academy of Medical Sciences (CAMS) and Peking Union Medical College (PUMC); Beijing, P. R. China |
| Bo Chen, MD       | National Cancer Center/National Clinical Research Center for Cancer/Cancer Hospital, Chinese Academy of Medical Sciences (CAMS) and Peking Union Medical College (PUMC); Beijing, P. R. China |
| Su-Yu Zhu, MD     | Hunan Cancer Hospital and the Affiliated Cancer Hospital of Xiangya School of Medicine, Changsha, Hunan, P. R. China                                                                          |
| Mei Shi, MD       | Xijing Hospital, Fourth Military Medical University, Xi'an, Shaanxi, P. R. China                                                                                                              |
| Hang Su, MD       | 307 Hospital, Academy of Military Medical Science, Beijing, P. R. China                                                                                                                       |
| Ying Wang, MD     | Chongqing Cancer Hospital & Cancer Institute, Chongqing, P. R. China                                                                                                                          |
| Xia He, MD        | Jiangsu Cancer Hospital & Jiangsu Institute of Cancer Research, Nanjing, Jiangsu, P. R. China                                                                                                 |
| Li-Ming Xu, MD    | Tianjin Medical University Cancer Institute & Hospital, Key Laboratory of Cancer Prevention and Therapy, National Clinical Research Center for Cancer, Tianjin 300060, P. R. China            |
| Zhi-Yong Yuan, MD | Tianjin Medical University Cancer Institute & Hospital, Key Laboratory of Cancer Prevention and Therapy, National Clinical Research Center for Cancer, Tianjin 300060, P. R. China            |
| Li-Ling Zhang,    | Union Hospital, Tongji Medical College, Huazhong                                                                                                                                              |

|                    |                                                                                                                                                                               |
|--------------------|-------------------------------------------------------------------------------------------------------------------------------------------------------------------------------|
| MD                 | University of Science and Technology, Wuhan, Hubei, P. R. China                                                                                                               |
| Gang Wu, MD        | Union Hospital, Tongji Medical College, Huazhong University of Science and Technology, Wuhan, Hubei, P. R. China                                                              |
| Bao-Lin Qu, MD     | The General Hospital of Chinese People's Liberation Army, Beijing, P. R. China                                                                                                |
| Li-Ting Qian, MD   | The Affiliated Provincial Hospital of Anhui Medical University, Hefei, Anhui, P. R. China                                                                                     |
| Xiao-Rong Hou, MD  | Peking Union Medical College Hospital, Chinese Academy of Medical Sciences (CAMS) and Peking Union Medical College (PUMC), Beijing, P. R. China                               |
| Fu-Quan Zhang, MD  | Peking Union Medical College Hospital, Chinese Academy of Medical Sciences (CAMS) and Peking Union Medical College (PUMC), Beijing, P. R. China                               |
| Yu-Jing Zhang, MD  | Sun Yat-sen University Cancer Center; State Key Laboratory of Oncology in South China; Collaborative Innovation Center for Cancer Medicine, Guangzhou, Guangdong, P. R. China |
| Yuan Zhu, MD       | Zhejiang Cancer Hospital, Hangzhou, Zhejiang, P. R. China                                                                                                                     |
| Jian-Zhong Cao, MD | Shanxi Cancer Hospital and the Affiliated Cancer Hospital of Shanxi Medical University, Taiyuan, Shanxi, P. R. China                                                          |
| Sheng-Min Lan, MD  | Shanxi Cancer Hospital and the Affiliated Cancer Hospital of Shanxi Medical University, Taiyuan, Shanxi, P. R. China                                                          |
| Jun-Xin Wu, MD     | Fujian Provincial Cancer Hospital, Fuzhou, Fujian, P. R. China                                                                                                                |
